# Supplementary material
Source: PubMed Central journal article supplement (PMC2842152)

**Supplemental Figure 1. ABCA1 silencing does not increase endogenous LXR $\alpha$  ligand binding activity in rat hepatoma cells.** Control and ABCA1-silenced McA cells were transiently cotransfected with: 1) GAL4-driven luciferase reporter construct (pMH100X-TK-Luc), 2) an expression vector containing the Gal4 DNA binding domain fused to the LXR $\alpha$  ligand binding domain (pCMX-Gal4-LXR $\alpha$ LB $\alpha$ ), and 3) a control vector (pRL-CMV). Cultures were stimulated with either oleate (0.8 mM) or LXR agonist (positive control, 5  $\cdot$  M T0901317) overnight before a dual luciferase assay was performed. Results are representative of two separate experiments and are expressed as mean  $\pm$  SEM (n=4). \*\*\*, (p<0.001) by student's t-test.

**Supplemental Figure 2. ERK and mTOR activation is not responsible for elevated TG secretion in ABCA1-silenced McA cells.** **A.** Control and ABCA1 siRNA transfected McA cells were incubated  $\pm$  0.8 mM oleate for 12 h. Cell lysates were then harvested and Western blotted for p-ERK, t-ERK and pmTOR. **B.** Control and ABCA1 siRNA transfected McA cells (25 nM for 48 h) were preincubated with 10 nM U0126 (inhibitor of ERK activation) for 1 h before addition of radiolabeling medium (5  $\cdot$  Ci/ml [ $^3$ H]-oleate + 0.8 mM oleate), followed by an additional 12 h incubation. Conditioned medium (500  $\mu$ l; pooled n=3) was fractionated by FPLC and radiolabel in each fraction was determined. VLDL elution position (fractions 30-35) is denoted. **C.** Control or ABCA1 siRNA transfected McA cells were incubated with vehicle (DMSO) or 10  $\mu$ M rapamycin (RAPA) for 1 h before addition of radiolabeling medium (5  $\mu$ Ci/ml [ $^3$ H]-oleate + 0.8 mM oleate). After an additional 12 h incubation, cells and medium were lipid extracted, radiolabel incorporation into TG was quantified by thin-layer chromatography, and the data (mean  $\pm$  SEM, n=3) were normalized to assayed cellular protein. \*, (p<0.05), \*\*\*, (p<0.001) by student's t-test.

# Supplement Figure 1

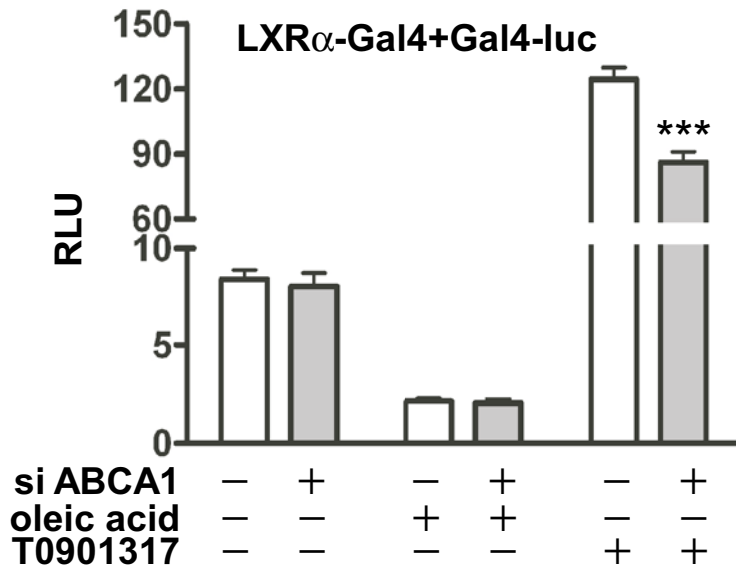

# Supplement Figure 2

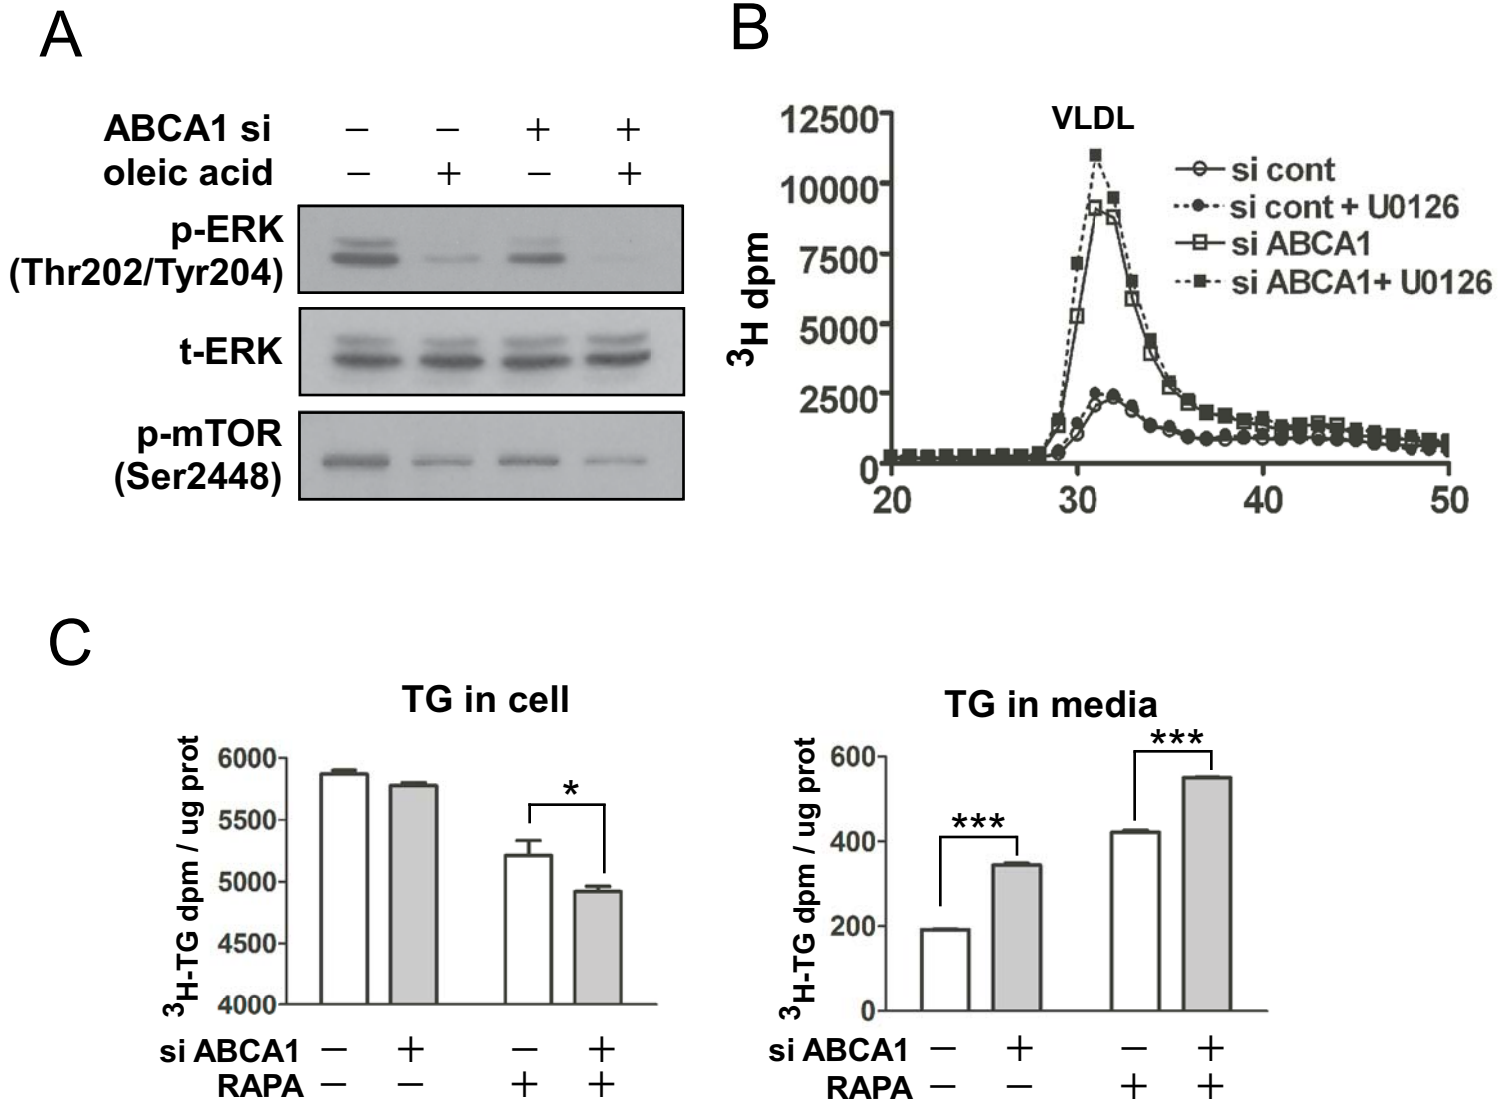

Supplement: supp_M900083-JLR200_suppdata.pdf [file supp_M900083-JLR200_suppdata.pdf]
